# Supplementary material
Source: ML conference proceedings conference paper supplement (https://proceedings.mlr.press/v77/gregorova17a.html)
Supplement: Supplementary file [file gregorova17a-supp.pdf]

# Supplement : Learning Predictive Leading Indicators for Forecasting Time Series Systems with Unknown Clusters of Forecast Tasks

Magda Gregorová<sup>1,2</sup>

MAGDA.GREGOROVA@HESGE.CH

Alexandros Kalousis<sup>1,2</sup>

ALEXANDROS.KALOUSIS@HESGE.CH

Stéphane Marchand-Maillet<sup>2</sup>

STEPHANE.MARCHAND-MAILLET@UNIGE.CH

<sup>1</sup>Geneva School of Business Administration, HES-SO University of Applied Sciences of Western Switzerland; <sup>2</sup>University of Geneva, Switzerland

**Editors:** Yung-Kyun Noh and Min-Ling Zhang

## Appendix A. Experimental data and transformations

Table 1 lists the measurement sites of the Water Service of the US Geological Survey (<http://www.usgs.gov/>) whose data we use in the USGS experiments in section 5.2 of the main text. The original data are the daily averages of the physical discharge in cubic feet per second (parameter code 00060) downloaded from the USGS database on 9/9/2016. We have used the data up to 31/12/2014 and before modelling transformed them by taking the year-on-year log-differences.

Table 1: Measurement sites for the river-flow data

| Code     | Description                                        |
|----------|----------------------------------------------------|
| 06191500 | Yellowstone River at Corwin Springs MT             |
| 06192500 | Yellowstone River near Livingston MT               |
| 06214500 | Yellowstone River at Billings MT                   |
| 06295000 | Yellowstone River at Forsyth MT                    |
| 06309000 | Yellowstone River at Miles City MT                 |
| 06327500 | Yellowstone River at Glendive MT                   |
| 06329500 | Yellowstone River near Sidney MT                   |
| 01129200 | CONNECTICUT R BELOW INDIAN STREAM NR PITTSBURG, NH |
| 01129500 | CONNECTICUT RIVER AT NORTH STRATFORD, NH           |
| 01131500 | CONNECTICUT RIVER NEAR DALTON, NH                  |
| 01138500 | CONNECTICUT RIVER AT WELLS RIVER, VT               |
| 01144500 | CONNECTICUT RIVER AT WEST LEBANON, NH              |
| 01154500 | CONNECTICUT RIVER AT NORTH WALPOLE, NH             |
| 01170500 | CONNECTICUT RIVER AT MONTAGUE CITY, MA             |
| 01184000 | CONNECTICUT RIVER AT THOMPSONVILLE, CT             |

Table 3 lists the macro-economic indicators of [Stock and Watson \(2012\)](#) used in our economic experiment in section 5.2 in the main text. Before using for modelling we have applied the same pre-processing steps as in [Stock and Watson \(2012\)](#).

We have

- transformed the monthly data to quarterly by taking the quarterly averages (column Q in table 3);
- applied the stationarizing transformations described in table 2 (column T in table 3);
- cleaned the data from outliers by replacing observations with absolute deviations from median larger than 6 times the interquartile range by the median of the 5 preceding values.

Table 2: Stationarizing transformations

| T | Transformation                                  |
|---|-------------------------------------------------|
| 1 | $y_t = z_t$                                     |
| 2 | $y_t = z_t - z_{t-1}$                           |
| 3 | $y_t = (z_t - z_{t-1}) - (z_{t-1} - z_{t-2})$   |
| 4 | $y_t = \log(z_t)$                               |
| 5 | $y_t = \ln(z_t/z_{t-1})$                        |
| 6 | $y_t = \ln(z_t/z_{t-1}) - \ln(z_{t-1}/z_{t-2})$ |

$z_t$  is the original data,  $y_t$  is the transformed series

## Appendix B. Experimental results

This section provides further details on experimental results not included in the main text due to space limitation.

### B.1. Synthetic experiments

Fig. 1 shows the synthesis of the model parameter matrices  $\mathbf{W}$  for the six synthetic experimental designs. The displayed structures correspond to the schema of the  $\mathbf{W}$  matrix presented in Fig. 1 of the main text. For the figure, the matrices were binarised to simply indicate the existence (1) or non-existence (0) of a G-causal link. The white-to-black shading reflects the number of experimental replications in which this binary indicator is active (equal to 1). So, a black element in the matrix means that this G-causal link was learned in all the 20 re-samples of the generating process. White means no G-causality in any of the re-samples. Though none of the sparse method was able to clearly and systematically recover the true structures, VARL1 and VARLG clearly suffer from more numerous and more frequent over-selections than CLVAR which matches the true structures more closely and with higher selection stability (fewer light-shaded elements). The 4th experimental set-up is included in the main text as Fig. 4.

Fig. 2 summarises the scaling properties of the CLVAR method with increasing increasing sample size  $T$  and the number of time series  $K$ . In each experiment, we selected a single hyper-parameter combination (near the optimal) and measured the time in seconds (on a

Table 3: Macro-economic data and transformations

| Code     | Q | T | Description                                                        |
|----------|---|---|--------------------------------------------------------------------|
| GDP251   | Q | 5 | real gross domestic product, quantity index (2000=100) , saar      |
| CPIAUCSL | M | 6 | cpi all items (sa) fred                                            |
| FYFF     | M | 2 | interest rate: federal funds (effective) (% per annum,nsa)         |
| PSCCOMR  | M | 5 | real spot mrkt price idx:bls & crb: all commod(1967=100)           |
| FMRNBA   | M | 3 | depository inst reserves:nonborrowed,adj res req chgs(mil\$,sa)    |
| FMRRR    | M | 6 | depository inst reserves:total,adj for reserve req chgs(mil\$ ,sa) |
| FM2      | M | 6 | money stock:m2 (bil\$,sa)                                          |
| GDP252   | Q | 5 | real personal consumpt expend, quantity idx (2000=100) , saar      |
| IPS10    | M | 5 | industrial production index - total index                          |
| UTL11    | M | 1 | capacity utilization - manufacturing (sic)                         |
| LHUR     | M | 2 | unemployment rate: all workers, 16 years & over (% ,sa)            |
| HSFR     | M | 4 | housing starts:nonfarm(1947-58),total farm& nonfarm(1959-)         |
| PWFSA    | M | 6 | producer price index: finished goods (82=100,sa)                   |
| GDP273   | Q | 6 | personal consumption expenditures, price idx (2000=100) , saar     |
| CES275R  | M | 5 | real avg hrly earnings, prod wrkrs, nonfarm - goods-producing      |
| FM1      | M | 6 | money stock: m1(bil\$ ,sa)                                         |
| FSPIN    | M | 5 | s& p's common stock price index: industrials (1941-43=10)          |
| FYGT10   | M | 2 | interest rate: u.s.treasury const matur,10-yr.(% per ann,nsa)      |
| EXRUS    | M | 5 | united states,effective exchange rate(merm)(index no.)             |
| CES002   | M | 5 | employees, nonfarm - total private                                 |

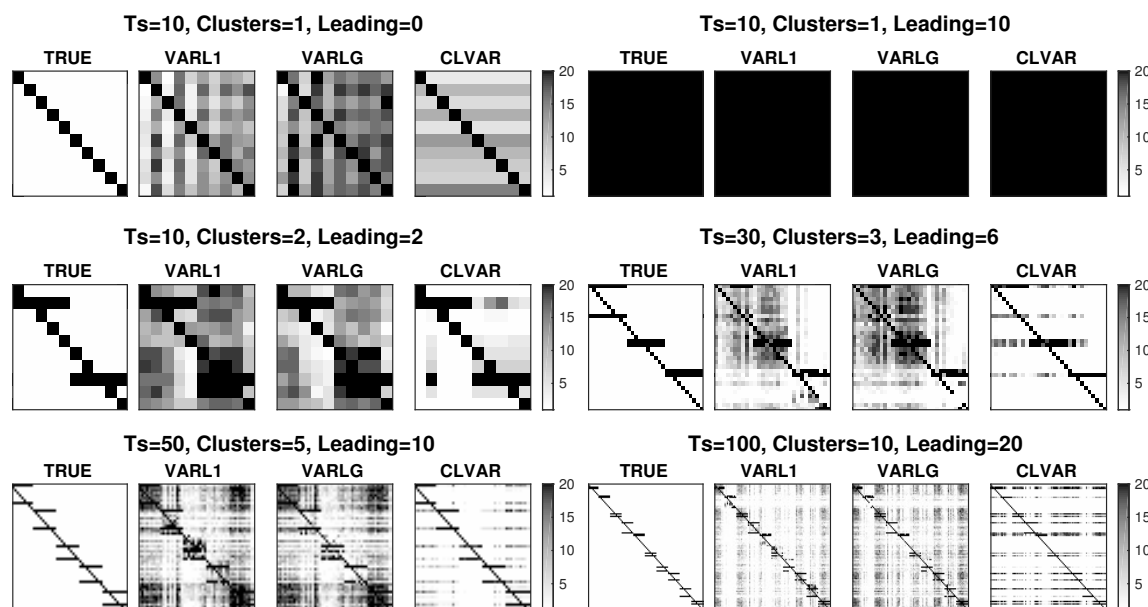

Figure 1: Synthesis of model parameters  $\mathbf{W}$

single Intel(R) Xeon(R) CPU E5-2680 v2 @ 2.80GHz) and the number of iterations needed till the convergence of the objective (with  $10^{-5}$  tolerance) for the 20 data re-samples. We used the  $\ell_2$  regularised solution as a warm start. The empirical results correspond to the theoretical complexity analysis of section 3.2 in the main text. For an experimental set-up with fixed number of series  $K$  (and G-causal structure), the run-time typically grows fairly slowly with the sample sizes  $T$ . However, the increases are much more important when moving to larger experiments, with higher  $K$  and more complicated structures. Here the growth in run-time is accompanied by higher number of iterations. From our experimental set-up it is difficult to separate the effect of enlarging the time-series systems in terms of higher  $K$  from the effect of more complicated structures in terms of higher number of clusters and leading indicators. In reality, we expect these to go hand-in-hand so in this sense our empirical analysis complements the theoretical asymptotic complexity analysis of section 3.2 of the main text

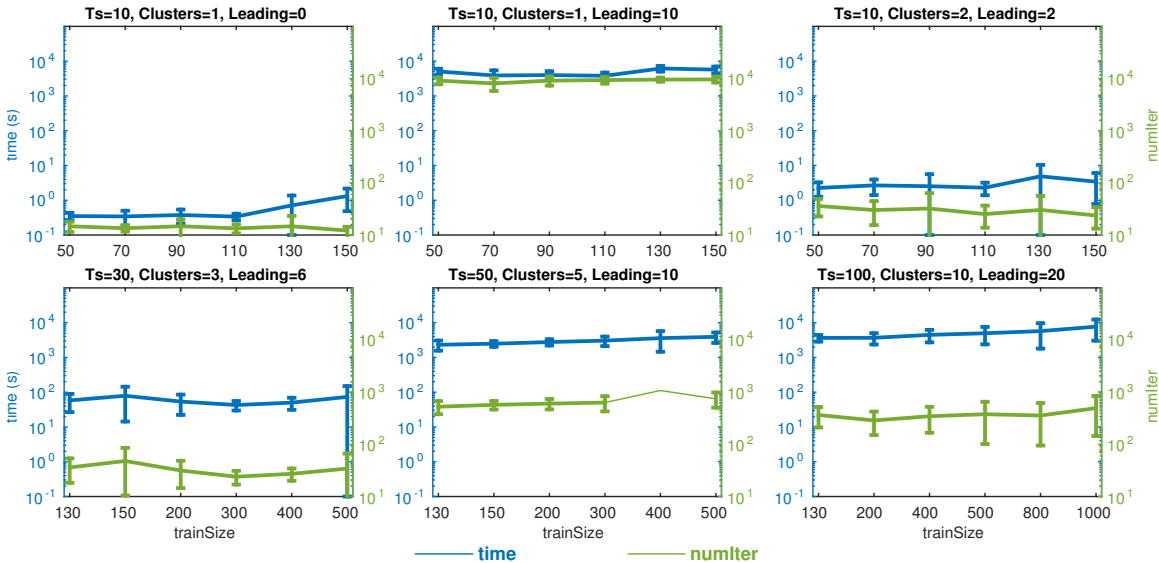

Figure 2: Runtime and number of iterations

Table 4 provides the numerical data behind the plots of Fig. 3(a) in the main text. The predictive accuracy is measured by mean squared error (MSE) of 1-step-ahead forecasts relative to the forecasts produced by the VAR with the true generative coefficients (the irreducible error). The relative MSE is averaged over the 500 hold-out points (the models are fixed and the forecasts are produced by sliding forward over the dataset). The *avg* and *std* are the average and standard deviation calculated over the 20 re-samples of the data for each experimental design.

Table 4: Synthetic experiments: Relative MSE over true model

| trainSize                     | stat | AR     | VARL2  | VARL1  | VARLG  | CLVAR  |
|-------------------------------|------|--------|--------|--------|--------|--------|
| Ts=10, Clusters=1, Leading=0  |      |        |        |        |        |        |
| 50                            | avg  | 1.225  | 3.113  | 1.974  | 2.513  | 1.772  |
|                               | std  | 0.102  | 0.637  | 0.310  | 0.515  | 0.643  |
| 70                            | avg  | 1.143  | 2.570  | 1.503  | 1.868  | 1.395  |
|                               | std  | 0.063  | 0.474  | 0.162  | 0.304  | 0.328  |
| 90                            | avg  | 1.098  | 2.186  | 1.324  | 1.545  | 1.219  |
|                               | std  | 0.043  | 0.353  | 0.125  | 0.203  | 0.082  |
| 110                           | avg  | 1.071  | 1.926  | 1.232  | 1.368  | 1.160  |
|                               | std  | 0.030  | 0.268  | 0.086  | 0.133  | 0.055  |
| 130                           | avg  | 1.052  | 1.745  | 1.172  | 1.267  | 1.121  |
|                               | std  | 0.020  | 0.230  | 0.062  | 0.096  | 0.038  |
| 150                           | avg  | 1.043  | 1.617  | 1.143  | 1.214  | 1.102  |
|                               | std  | 0.017  | 0.178  | 0.050  | 0.076  | 0.034  |
| Ts=10, Clusters=1, Leading=10 |      |        |        |        |        |        |
| 50                            | avg  | 12.564 | 23.449 | 42.347 | 42.055 | 22.319 |
|                               | std  | 5.258  | 18.273 | 32.893 | 32.115 | 15.458 |
| 70                            | avg  | 12.649 | 12.712 | 9.610  | 9.634  | 11.692 |
|                               | std  | 4.507  | 4.565  | 3.681  | 3.472  | 4.769  |
| 90                            | avg  | 12.281 | 4.905  | 4.943  | 4.897  | 4.934  |
|                               | std  | 4.697  | 1.545  | 1.513  | 1.547  | 1.584  |
| 110                           | avg  | 12.583 | 3.569  | 3.565  | 3.562  | 3.509  |
|                               | std  | 4.316  | 0.940  | 0.939  | 0.940  | 0.917  |
| 130                           | avg  | 12.028 | 2.527  | 2.523  | 2.519  | 2.477  |
|                               | std  | 3.762  | 0.480  | 0.479  | 0.477  | 0.486  |
| 150                           | avg  | 11.637 | 2.195  | 2.194  | 2.189  | 2.158  |
|                               | std  | 3.157  | 0.417  | 0.417  | 0.414  | 0.433  |
| Ts=10, Clusters=2, Leading=2  |      |        |        |        |        |        |
| 50                            | avg  | 1.429  | 2.730  | 1.743  | 2.124  | 1.674  |
|                               | std  | 0.167  | 0.565  | 0.246  | 0.357  | 0.308  |
| 70                            | avg  | 1.336  | 2.296  | 1.522  | 1.689  | 1.405  |
|                               | std  | 0.096  | 0.346  | 0.206  | 0.199  | 0.139  |
| 90                            | avg  | 1.295  | 1.998  | 1.398  | 1.499  | 1.289  |
|                               | std  | 0.100  | 0.253  | 0.139  | 0.146  | 0.116  |
| 110                           | avg  | 1.258  | 1.824  | 1.320  | 1.396  | 1.199  |
|                               | std  | 0.064  | 0.214  | 0.082  | 0.103  | 0.062  |
| 130                           | avg  | 1.237  | 1.686  | 1.283  | 1.347  | 1.156  |
|                               | std  | 0.057  | 0.181  | 0.078  | 0.085  | 0.050  |
| 150                           | avg  | 1.229  | 1.566  | 1.255  | 1.300  | 1.133  |
|                               | std  | 0.054  | 0.171  | 0.076  | 0.081  | 0.043  |

continues in next page ...

... continues from previous page

| trainSize                       | stat | AR    | VARL2 | VARL1 | VARLG | CLVAR |
|---------------------------------|------|-------|-------|-------|-------|-------|
| Ts=30, Clusters=3, Leading=6    |      |       |       |       |       |       |
| 130                             | avg  | 1.532 | 2.424 | 1.355 | 1.490 | 1.261 |
|                                 | std  | 0.142 | 0.361 | 0.091 | 0.131 | 0.081 |
| 150                             | avg  | 1.512 | 2.245 | 1.319 | 1.414 | 1.225 |
|                                 | std  | 0.129 | 0.308 | 0.081 | 0.111 | 0.062 |
| 200                             | avg  | 1.471 | 1.861 | 1.257 | 1.289 | 1.172 |
|                                 | std  | 0.113 | 0.205 | 0.062 | 0.069 | 0.048 |
| 300                             | avg  | 1.451 | 1.586 | 1.164 | 1.224 | 1.100 |
|                                 | std  | 0.103 | 0.135 | 0.039 | 0.051 | 0.031 |
| 400                             | avg  | 1.438 | 1.375 | 1.119 | 1.151 | 1.073 |
|                                 | std  | 0.100 | 0.086 | 0.028 | 0.036 | 0.024 |
| 500                             | avg  | 1.434 | 1.298 | 1.097 | 1.116 | 1.059 |
|                                 | std  | 0.099 | 0.068 | 0.023 | 0.027 | 0.018 |
| Ts=50, Clusters=5, Leading=10   |      |       |       |       |       |       |
| 130                             | avg  | 3.327 | 4.376 | 2.024 | 2.160 | 1.746 |
|                                 | std  | 0.557 | 0.792 | 0.306 | 0.277 | 0.223 |
| 150                             | avg  | 3.254 | 3.920 | 1.801 | 1.915 | 1.577 |
|                                 | std  | 0.544 | 0.685 | 0.205 | 0.215 | 0.196 |
| 200                             | avg  | 3.200 | 3.203 | 1.583 | 1.620 | 1.324 |
|                                 | std  | 0.506 | 0.523 | 0.146 | 0.145 | 0.109 |
| 300                             | avg  | 3.161 | 2.280 | 1.347 | 1.392 | 1.128 |
|                                 | std  | 0.491 | 0.301 | 0.083 | 0.092 | 0.034 |
| 400                             | avg  | 3.123 | 1.844 | 1.228 | 1.299 | 1.091 |
|                                 | std  | 0.478 | 0.192 | 0.053 | 0.070 | 0.025 |
| 500                             | avg  | 3.097 | 1.622 | 1.172 | 1.214 | 1.081 |
|                                 | std  | 0.468 | 0.144 | 0.039 | 0.050 | 0.025 |
| Ts=100, Clusters=10, Leading=20 |      |       |       |       |       |       |
| 130                             | avg  | 1.890 | 3.362 | 1.518 | 1.807 | 1.734 |
|                                 | std  | 0.202 | 0.536 | 0.118 | 0.184 | 0.178 |
| 200                             | avg  | 1.845 | 2.855 | 1.350 | 1.478 | 1.415 |
|                                 | std  | 0.189 | 0.420 | 0.078 | 0.106 | 0.109 |
| 400                             | avg  | 1.801 | 2.196 | 1.225 | 1.268 | 1.180 |
|                                 | std  | 0.177 | 0.264 | 0.050 | 0.059 | 0.049 |
| 600                             | avg  | 1.783 | 1.820 | 1.137 | 1.191 | 1.108 |
|                                 | std  | 0.172 | 0.182 | 0.031 | 0.043 | 0.026 |
| 800                             | avg  | 1.777 | 1.644 | 1.104 | 1.129 | 1.084 |
|                                 | std  | 0.170 | 0.142 | 0.023 | 0.029 | 0.021 |
| 1000                            | avg  | 1.774 | 1.501 | 1.090 | 1.100 | 1.065 |
|                                 | std  | 0.170 | 0.115 | 0.020 | 0.022 | 0.019 |

Table 5 provides the numerical data behind the plots of Fig. 3(b) in the main text. The selection accuracy of the true G-causal links is measured by the average between the false negative and false positive rates. The *avg* and *std* are the average and standard deviation calculated over the 20 re-samples of the data for each experimental design.

Table 5: Synthetic experiments: Selection errors of true G-causal links

| trainSize                     | stat | AR    | VARL2 | VARL1 | VARLG | CLVAR |
|-------------------------------|------|-------|-------|-------|-------|-------|
| Ts=10, Clusters=1, Leading=0  |      |       |       |       |       |       |
| 50                            | avg  | 0.000 | 0.500 | 0.268 | 0.316 | 0.151 |
|                               | std  | 0.000 | 0.000 | 0.062 | 0.072 | 0.153 |
| 70                            | avg  | 0.000 | 0.500 | 0.245 | 0.318 | 0.119 |
|                               | std  | 0.000 | 0.000 | 0.027 | 0.056 | 0.094 |
| 90                            | avg  | 0.000 | 0.500 | 0.207 | 0.301 | 0.118 |
|                               | std  | 0.000 | 0.000 | 0.027 | 0.026 | 0.043 |
| 110                           | avg  | 0.000 | 0.500 | 0.172 | 0.285 | 0.122 |
|                               | std  | 0.000 | 0.000 | 0.026 | 0.027 | 0.034 |
| 130                           | avg  | 0.000 | 0.500 | 0.141 | 0.268 | 0.138 |
|                               | std  | 0.000 | 0.000 | 0.017 | 0.029 | 0.036 |
| 150                           | avg  | 0.000 | 0.500 | 0.120 | 0.245 | 0.143 |
|                               | std  | 0.000 | 0.000 | 0.019 | 0.027 | 0.041 |
| Ts=10, Clusters=1, Leading=10 |      |       |       |       |       |       |
| 50                            | avg  | 0.450 | 0.000 | 0.027 | 0.031 | 0.043 |
|                               | std  | 0.000 | 0.000 | 0.084 | 0.095 | 0.112 |
| 70                            | avg  | 0.450 | 0.000 | 0.013 | 0.013 | 0.010 |
|                               | std  | 0.000 | 0.000 | 0.054 | 0.058 | 0.026 |
| 90                            | avg  | 0.450 | 0.000 | 0.001 | 0.000 | 0.017 |
|                               | std  | 0.000 | 0.000 | 0.005 | 0.000 | 0.042 |
| 110                           | avg  | 0.450 | 0.000 | 0.000 | 0.000 | 0.000 |
|                               | std  | 0.000 | 0.000 | 0.000 | 0.000 | 0.000 |
| 130                           | avg  | 0.450 | 0.000 | 0.000 | 0.000 | 0.000 |
|                               | std  | 0.000 | 0.000 | 0.000 | 0.000 | 0.000 |
| 150                           | avg  | 0.450 | 0.000 | 0.000 | 0.000 | 0.000 |
|                               | std  | 0.000 | 0.000 | 0.000 | 0.000 | 0.000 |
| Ts=10, Clusters=2, Leading=2  |      |       |       |       |       |       |
| 50                            | avg  | 0.222 | 0.500 | 0.190 | 0.268 | 0.168 |
|                               | std  | 0.000 | 0.000 | 0.041 | 0.041 | 0.103 |
| 70                            | avg  | 0.222 | 0.500 | 0.179 | 0.248 | 0.096 |
|                               | std  | 0.000 | 0.000 | 0.072 | 0.039 | 0.061 |
| 90                            | avg  | 0.222 | 0.500 | 0.159 | 0.222 | 0.094 |
|                               | std  | 0.000 | 0.000 | 0.067 | 0.030 | 0.051 |
| 110                           | avg  | 0.222 | 0.500 | 0.155 | 0.200 | 0.058 |
|                               | std  | 0.000 | 0.000 | 0.086 | 0.031 | 0.044 |

continues in next page ...

... continues from previous page

| trainSize                       | stat | AR    | VARL2 | VARL1 | VARLG | CLVAR |
|---------------------------------|------|-------|-------|-------|-------|-------|
| 130                             | avg  | 0.222 | 0.500 | 0.192 | 0.205 | 0.067 |
|                                 | std  | 0.000 | 0.000 | 0.107 | 0.076 | 0.054 |
| 150                             | avg  | 0.222 | 0.500 | 0.210 | 0.196 | 0.054 |
|                                 | std  | 0.000 | 0.000 | 0.118 | 0.064 | 0.034 |
| Ts=30, Clusters=3, Leading=6    |      |       |       |       |       |       |
| 130                             | avg  | 0.321 | 0.500 | 0.175 | 0.204 | 0.173 |
|                                 | std  | 0.000 | 0.000 | 0.015 | 0.017 | 0.037 |
| 150                             | avg  | 0.321 | 0.500 | 0.165 | 0.192 | 0.176 |
|                                 | std  | 0.000 | 0.000 | 0.016 | 0.018 | 0.027 |
| 200                             | avg  | 0.321 | 0.500 | 0.178 | 0.183 | 0.165 |
|                                 | std  | 0.000 | 0.000 | 0.046 | 0.014 | 0.029 |
| 300                             | avg  | 0.321 | 0.500 | 0.225 | 0.166 | 0.107 |
|                                 | std  | 0.000 | 0.000 | 0.012 | 0.027 | 0.034 |
| 400                             | avg  | 0.321 | 0.500 | 0.202 | 0.242 | 0.098 |
|                                 | std  | 0.000 | 0.000 | 0.013 | 0.012 | 0.029 |
| 500                             | avg  | 0.321 | 0.500 | 0.184 | 0.220 | 0.095 |
|                                 | std  | 0.000 | 0.000 | 0.009 | 0.013 | 0.022 |
| Ts=50, Clusters=5, Leading=10   |      |       |       |       |       |       |
| 130                             | avg  | 0.321 | 0.500 | 0.226 | 0.226 | 0.123 |
|                                 | std  | 0.000 | 0.000 | 0.040 | 0.010 | 0.032 |
| 150                             | avg  | 0.321 | 0.500 | 0.211 | 0.217 | 0.110 |
|                                 | std  | 0.000 | 0.000 | 0.039 | 0.011 | 0.035 |
| 200                             | avg  | 0.321 | 0.500 | 0.212 | 0.196 | 0.077 |
|                                 | std  | 0.000 | 0.000 | 0.047 | 0.009 | 0.027 |
| 300                             | avg  | 0.321 | 0.500 | 0.257 | 0.169 | 0.038 |
|                                 | std  | 0.000 | 0.000 | 0.011 | 0.021 | 0.008 |
| 400                             | avg  | 0.321 | 0.500 | 0.236 | 0.183 | 0.034 |
|                                 | std  | 0.000 | 0.000 | 0.012 | 0.047 | 0.011 |
| 500                             | avg  | 0.321 | 0.500 | 0.224 | 0.218 | 0.033 |
|                                 | std  | 0.000 | 0.000 | 0.011 | 0.033 | 0.011 |
| Ts=100, Clusters=10, Leading=20 |      |       |       |       |       |       |
| 130                             | avg  | 0.321 | 0.500 | 0.120 | 0.164 | 0.260 |
|                                 | std  | 0.000 | 0.000 | 0.006 | 0.009 | 0.054 |
| 200                             | avg  | 0.321 | 0.500 | 0.098 | 0.132 | 0.159 |
|                                 | std  | 0.000 | 0.000 | 0.006 | 0.006 | 0.028 |
| 400                             | avg  | 0.321 | 0.500 | 0.158 | 0.094 | 0.121 |
|                                 | std  | 0.000 | 0.000 | 0.006 | 0.006 | 0.016 |
| 600                             | avg  | 0.321 | 0.500 | 0.129 | 0.175 | 0.104 |
|                                 | std  | 0.000 | 0.000 | 0.004 | 0.005 | 0.011 |
| 800                             | avg  | 0.321 | 0.500 | 0.110 | 0.154 | 0.100 |
|                                 | std  | 0.000 | 0.000 | 0.004 | 0.005 | 0.011 |
| 1000                            | avg  | 0.321 | 0.500 | 0.096 | 0.137 | 0.090 |
|                                 | std  | 0.000 | 0.000 | 0.004 | 0.005 | 0.011 |

continues in next page ...



... continues from previous page

| trainSize | stat | AR    | VARL2 | VARL1 | VARLG | CLVAR |
|-----------|------|-------|-------|-------|-------|-------|
|           | std  | 0.000 | 0.000 | 0.004 | 0.004 | 0.013 |

## B.2. Real-data experiments

Table 6 provides the numerical data behind the plots of Fig. 5(a) in the main text. The predictive accuracy is measured by mean squared error (MSE) of 1-step-ahead forecasts relative to the forecasts produced random walk model (= uses the last observed value as the 1-step-ahead forecast). The relative MSE is averaged over the 30 and 300 hold-out points for the Economic and the USGS dataset respectively (the models are fixed and the forecasts are produced by sliding forward over the dataset). The *avg* and *std* are the average and standard deviation calculated over the 20 re-samples of the data for each experimental dataset.

Table 6: Real-data experiments: Relative MSE over random walk

| trainSize      | stat | AR    | VARL2 | VARL1 | VARLG | CLVAR |
|----------------|------|-------|-------|-------|-------|-------|
| Economic Ts=20 |      |       |       |       |       |       |
| 50             | avg  | 0.413 | 0.573 | 0.498 | 0.498 | 0.436 |
|                | std  | 0.035 | 0.026 | 0.016 | 0.018 | 0.036 |
| 70             | avg  | 0.419 | 0.489 | 0.456 | 0.470 | 0.409 |
|                | std  | 0.028 | 0.025 | 0.041 | 0.027 | 0.025 |
| 90             | avg  | 0.400 | 0.455 | 0.420 | 0.442 | 0.392 |
|                | std  | 0.025 | 0.024 | 0.023 | 0.021 | 0.025 |
| 110            | avg  | 0.384 | 0.424 | 0.379 | 0.395 | 0.370 |
|                | std  | 0.022 | 0.024 | 0.022 | 0.029 | 0.025 |
| 130            | avg  | 0.380 | 0.406 | 0.368 | 0.368 | 0.367 |
|                | std  | 0.023 | 0.026 | 0.022 | 0.026 | 0.024 |
| USGS Ts=17     |      |       |       |       |       |       |
| 200            | avg  | 0.912 | 1.857 | 1.222 | 1.222 | 0.980 |
|                | std  | 0.013 | 0.098 | 0.058 | 0.046 | 0.069 |
| 300            | avg  | 0.881 | 1.320 | 0.876 | 0.922 | 0.746 |
|                | std  | 0.003 | 0.040 | 0.012 | 0.019 | 0.035 |
| 400            | avg  | 0.858 | 0.934 | 0.760 | 0.756 | 0.708 |
|                | std  | 0.001 | 0.030 | 0.026 | 0.012 | 0.019 |
| 500            | avg  | 0.855 | 0.855 | 0.754 | 0.714 | 0.675 |
|                | std  | 0.003 | 0.021 | 0.011 | 0.007 | 0.015 |
| 600            | avg  | 0.862 | 0.858 | 0.747 | 0.729 | 0.679 |
|                | std  | 0.002 | 0.004 | 0.004 | 0.020 | 0.024 |

Table 7 provides the numerical data behind the plots of Fig. 5(b) in the main text. The sparsity of the learned models is measured by the proportion of active edges in the learned G-causality graph. The *avg* and *std* are the average and standard deviation calculated over the 20 re-samples of the data for each experimental dataset.

Table 7: Real-data experiments: proportion of G-causal graph edges

| trainSize      | stat | AR    | VARL2 | VARL1 | VARLG | CLVAR |
|----------------|------|-------|-------|-------|-------|-------|
| Economic Ts=20 |      |       |       |       |       |       |
| 50             | avg  | 0.050 | 1.000 | 0.127 | 0.207 | 0.115 |
|                | std  | 0.000 | 0.000 | 0.092 | 0.012 | 0.024 |
| 70             | avg  | 0.050 | 1.000 | 0.394 | 0.172 | 0.110 |
|                | std  | 0.000 | 0.000 | 0.177 | 0.012 | 0.026 |
| 90             | avg  | 0.050 | 1.000 | 0.505 | 0.166 | 0.138 |
|                | std  | 0.000 | 0.000 | 0.100 | 0.011 | 0.053 |
| 110            | avg  | 0.050 | 1.000 | 0.502 | 0.412 | 0.182 |
|                | std  | 0.000 | 0.000 | 0.009 | 0.204 | 0.040 |
| 130            | avg  | 0.050 | 1.000 | 0.507 | 0.570 | 0.199 |
|                | std  | 0.000 | 0.000 | 0.007 | 0.096 | 0.042 |
| USGS Ts=17     |      |       |       |       |       |       |
| 200            | avg  | 0.059 | 1.000 | 0.618 | 0.465 | 0.363 |
|                | std  | 0.000 | 0.000 | 0.117 | 0.061 | 0.057 |
| 300            | avg  | 0.059 | 1.000 | 0.581 | 0.641 | 0.369 |
|                | std  | 0.000 | 0.000 | 0.018 | 0.010 | 0.081 |
| 400            | avg  | 0.059 | 1.000 | 0.629 | 0.625 | 0.412 |
|                | std  | 0.000 | 0.000 | 0.143 | 0.005 | 0.060 |
| 500            | avg  | 0.059 | 1.000 | 0.823 | 0.640 | 0.431 |
|                | std  | 0.000 | 0.000 | 0.061 | 0.009 | 0.057 |
| 600            | avg  | 0.059 | 1.000 | 0.801 | 0.632 | 0.450 |
|                | std  | 0.000 | 0.000 | 0.014 | 0.090 | 0.020 |

## References

James H. Stock and Mark W. Watson. Generalized Shrinkage Methods for Forecasting Using Many Predictors. *Journal of Business & Economic Statistics*, 2012.
